# Supplementary material for: Development of a novel porous cobalt, phosphorus and nitrogen co-doped carbonaceous coating by phosphiding ZIF-67 grown on nitinol fiber for selective solid-phase microextraction of polycyclic aromatic hydrocarbons from water samples
Source: Royal Society of Chemistry journal article supplement (doi:10.1039/d2ay00340f), 2022-01-01
Supplement: d2ay00340f1.pdf [file d2ay00340f1.pdf]

## Electronic supplementary material

# Development of a novel porous cobalt, phosphorus and nitrogen co-doped carbonaceous coating by phosphiding ZIF-67 grown on Nitinol fiber for selective solid-phase microextraction of polycyclic aromatic hydrocarbons from water samples

Junliang Du<sup>a,b</sup>, · Rong Zhang<sup>b</sup>, · Feifei Wang<sup>b</sup>, · Xinzhen Du<sup>b\*</sup>

<sup>a</sup> Department of Chemistry and Chemical Engineering, Mianyang Normal University, Mianyang, 621000, China

<sup>b</sup> College of Chemistry and Chemical Engineering, Northwest Normal University, Lanzhou, 730070, China.

## Experimental Section

### Electrodeposition of the Co coating

The bare NiTi wires (55 mm in length) were ultrasonically cleaned with acetone and ultra-pure water for 10 min, respectively. Then, the bare NiTi wires were activated in a solution of HF, HNO<sub>3</sub> and H<sub>2</sub>O (1/4/5, v/v/v) for 2 min. After ultrasonic cleaning in ultra-pure water, the pretreated NiTi wires were dipped into the electrolytic solution as a working electrode, the Pt rod as a counter electrode and the saturated calomel electrode (SCE) as a reference electrode

---

\* Corresponding author at: College of Chemistry and Chemical Engineering, Northwest Normal University, Lanzhou, 730070, China.

E-mail address: duxz@nwnu.edu.cn (X. Du).

in the three-electrode system.  $\text{Co}(\text{Ac})_2$  solution of  $0.1 \text{ mol}\cdot\text{L}^{-1}$  served as an electrolyte, and  $-1.1 \text{ V}$  was applied to the system at  $40 \text{ }^\circ\text{C}$  for  $1000 \text{ s}$ . The NiTi wire with the Co coating (NiTi@Co) was thoroughly rinsed for subsequent in situ growth of ZIF-67.

### **Electrochemical in-situ growth of the ZIF-67 coating**

Typically,  $0.8 \text{ g}$  of 2-MIM was dissolved in the solution of  $7.5 \text{ mL}$  DMF and  $2.5 \text{ mL}$  ultra-pure water as an electrolyte. The NiTi@Co fiber was dipped into the electrolyte as a working electrode, the Pt rod as a counter electrode and the SCE as a reference electrode in the three-electrode system.  $4 \text{ V}$  was applied to the system at  $60 \text{ }^\circ\text{C}$  for  $700 \text{ s}$ . The resulting fiber was washed with methanol several times, and then dried in an oven at  $80 \text{ }^\circ\text{C}$  to obtain the NiTi@Co@ZIF-67 fiber.

### **Fabrication of the Co-P-NC coatings**

Firstly, the NiTi@Co@ZIF-67 fiber was placed in a porcelain boat, and  $3 \text{ g}$  of  $\text{NaH}_2\text{PO}_2$  was placed in the other one located at upstream side in a tubular furnace. Then, the temperature increased from room temperature to  $300 \text{ }^\circ\text{C}$  with a ramping rate of  $2 \text{ }^\circ\text{C}\cdot\text{min}^{-1}$  holding for  $2 \text{ h}$  in  $\text{N}_2$  atmosphere. Phosphorus was introduced into the N-doped carbonaceous coating derived from ZIF-67 grown on the NiTi substrate at the same time by the reaction of ZIF-67 with  $\text{NaH}_2\text{PO}_2$ . Thereafter, the fabricated fiber was cooled to room temperature. Finally the fabricated fiber was mounted to the SPME holder and conditioned in the SPME-LC interface for  $30 \text{ min}$  prior to use.

### **Optimization of SPME conditions for PAHs**

The detailed optimal results were shown in Fig. S1. As shown in Fig. S1a, pH has a little effect

on the adsorption efficiency. In this study, NaCl of 15–35% (w/v) was investigated. As shown in Fig. S1b, the adsorption efficiency was gradually increased with the increasing content of NaCl from 15% to 30%, and thereafter decreased at higher content of NaCl. In the following experiments, NaCl of 30% was selected to maintain the ionic strength of aqueous solution.

Stirring is an essential process to improve mass transfer and reduce the equilibration time. Therefore, stirring rate was studied over the range of 400-800 rpm. As shown in Fig. S1c, the highest adsorption efficiency was obtained at the stirring rate of 600 rpm. Furthermore, adsorption temperature also facilitates the diffusion of PAHs from the sample solution into the fiber coating. Nevertheless, higher adsorption temperature would adversely affect the adsorption performance due to the exothermic adsorption and the increased solubility of PAHs in water phase. As shown in Fig. S1d, the highest adsorption efficiency was achieved at the critical temperature of 35 °C. Therefore, 35 °C was selected for subsequent experiments. In addition, adsorption and desorption time are important factors in SPME. As can be seen in Fig. S1e and Fig. S1f, the adsorption equilibria were reached within 35 min, and the desorption equilibria of PAHs was achieved in the mobile phase within 4 min. Therefore, 35 min was selected for adsorption and 4 min were selected for desorption in subsequent study.

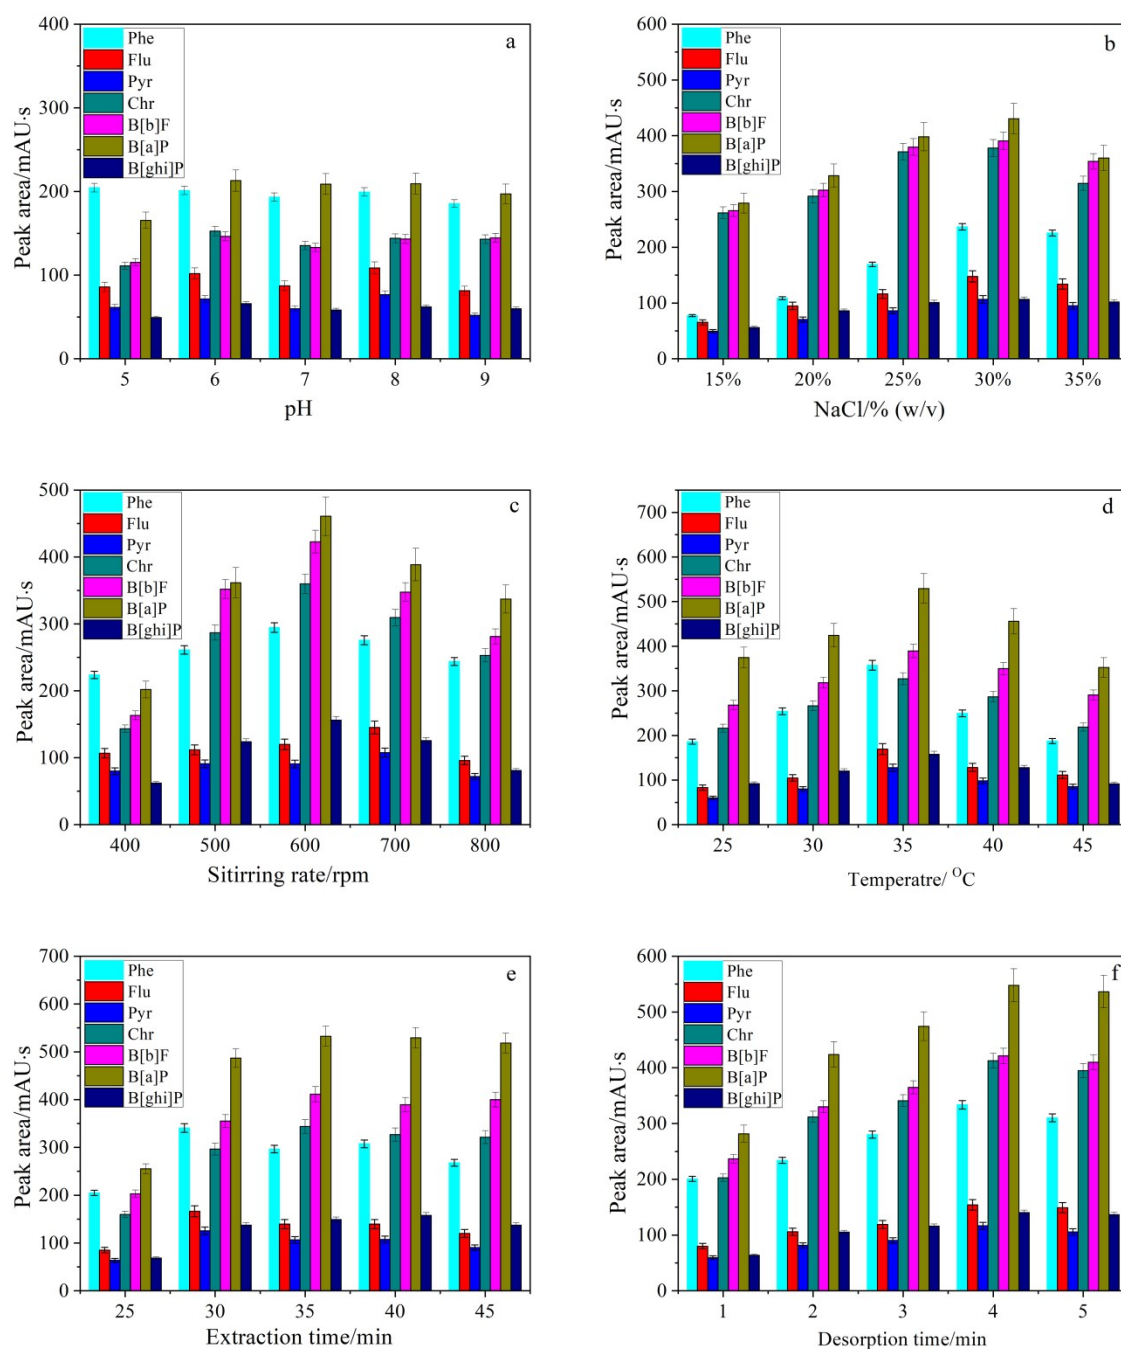

**Fig. S1** Effect of pH (a), ionic strength (b), stirring rate (c), extraction temperature (d), extraction time (e) and desorption time (f) on the extraction efficiency.

**Table S1** Analytical results for the enrichment and determination of target PAHs in real water samples (n = 3)

| Samples                                     | Analytes | Original<br>( $\mu\text{g}\cdot\text{L}^{-1}$ ) | Spiked (5.0 $\mu\text{g}\cdot\text{L}^{-1}$ ) |                 |             | Spiked (10 $\mu\text{g}\cdot\text{L}^{-1}$ ) |                 |             |
|---------------------------------------------|----------|-------------------------------------------------|-----------------------------------------------|-----------------|-------------|----------------------------------------------|-----------------|-------------|
|                                             |          |                                                 | Found<br>( $\mu\text{g}\cdot\text{L}^{-1}$ )  | Recovery<br>(%) | RSDs<br>(%) | Found<br>( $\mu\text{g}\cdot\text{L}^{-1}$ ) | Recovery<br>(%) | RSDs<br>(%) |
| Snow water                                  | Phe      | 0.73                                            | 5.05                                          | 86.4            | 5.30        | 10.69                                        | 99.6            | 5.18        |
|                                             | Flu      | ND                                              | 4.68                                          | 93.6            | 6.51        | 9.14                                         | 91.4            | 6.16        |
|                                             | Pyr      | ND                                              | 4.99                                          | 99.7            | 6.84        | 10.10                                        | 101             | 5.08        |
|                                             | Chr      | ND                                              | 4.61                                          | 92.1            | 5.47        | 8.54                                         | 85.4            | 6.62        |
|                                             | B[b]f    | 0.12                                            | 4.57                                          | 88.9            | 4.25        | 10.82                                        | 107             | 5.63        |
|                                             | B[a]p    | 0.69                                            | 5.74                                          | 101             | 5.83        | 10.42                                        | 97.3            | 5.49        |
|                                             | B[ghi]p  | ND                                              | 5.10                                          | 102             | 6.82        | 9.76                                         | 97.6            | 4.50        |
| Wastewater                                  | Phe      | 0.39                                            | 4.73                                          | 86.7            | 7.56        | 8.51                                         | 81.2            | 7.04        |
|                                             | Flu      | 0.62                                            | 4.99                                          | 87.4            | 8.68        | 9.00                                         | 83.8            | 6.32        |
|                                             | Pyr      | 0.58                                            | 5.27                                          | 93.8            | 7.79        | 8.46                                         | 78.8            | 7.86        |
|                                             | Chr      | 0.87                                            | 4.85                                          | 79.6            | 6.10        | 8.86                                         | 79.9            | 8.42        |
|                                             | B[b]f    | 1.10                                            | 4.92                                          | 76.3            | 8.51        | 10.5                                         | 93.6            | 5.88        |
|                                             | B[a]p    | 0.62                                            | 4.98                                          | 87.1            | 8.81        | 9.94                                         | 93.2            | 6.72        |
|                                             | B[ghi]p  | ND                                              | 3.73                                          | 74.5            | 6.96        | 8.85                                         | 88.5            | 5.10        |
| River water<br>(Site 1 in<br>upper section) | Phe      | 1.65                                            | 6.27                                          | 92.4            | 5.77        | 11.75                                        | 101             | 4.82        |
|                                             | Flu      | ND                                              | 4.95                                          | 99.0            | 4.29        | 9.67                                         | 96.7            | 5.56        |
|                                             | Pyr      | ND                                              | 5.15                                          | 103             | 5.66        | 9.48                                         | 94.8            | 5.48        |
|                                             | Chr      | ND                                              | 4.73                                          | 94.6            | 5.23        | 10.3                                         | 103             | 7.73        |
|                                             | B[b]f    | ND                                              | 5.25                                          | 105             | 6.79        | 9.83                                         | 98.3            | 6.22        |
|                                             | B[a]p    | 0.42                                            | 5.09                                          | 93.3            | 5.30        | 10.5                                         | 101             | 5.09        |
|                                             | B[ghi]p  | ND                                              | 4.60                                          | 91.9            | 5.63        | 9.66                                         | 96.6            | 5.67        |
| River water<br>(Site 2 in<br>suburb)        | Phe      | 1.29                                            | 6.18                                          | 97.8            | 6.36        | 11.07                                        | 97.8            | 5.55        |
|                                             | Flu      | 0.62                                            | 5.46                                          | 96.7            | 5.51        | 10.72                                        | 101             | 5.37        |
|                                             | Pyr      | 0.93                                            | 5.70                                          | 95.3            | 5.89        | 10.65                                        | 97.2            | 6.02        |
|                                             | Chr      | ND                                              | 5.10                                          | 102             | 5.67        | 10.40                                        | 104             | 5.29        |
|                                             | B[b]f    | ND                                              | 5.05                                          | 101             | 5.79        | 9.34                                         | 93.4            | 5.21        |
|                                             | B[a]p    | 0.51                                            | 5.47                                          | 99.1            | 6.75        | 10.61                                        | 101             | 7.06        |
|                                             | B[ghi]p  | ND                                              | 4.58                                          | 91.5            | 5.04        | 9.04                                         | 90.4            | 5.89        |
| River water<br>(Site 3 in<br>urban)         | Phe      | 0.23                                            | 5.43                                          | 104             | 6.26        | 9.7                                          | 94.7            | 5.77        |
|                                             | Flu      | ND                                              | 4.59                                          | 91.8            | 6.03        | 9.85                                         | 98.5            | 7.58        |

|         |      |       |      |      |      |      |      |
|---------|------|-------|------|------|------|------|------|
| Pyr     | 0.58 | 5.46  | 97.6 | 7.52 | 10.2 | 96.4 | 6.75 |
| Chr     | 0.21 | 4.96  | 95.0 | 7.44 | 10.5 | 103  | 5.13 |
| B[b]f   | ND   | 4.82  | 96.4 | 6.13 | 9.38 | 93.8 | 5.86 |
| B[a]p   | 0.70 | 5.8   | 102  | 5.35 | 9.92 | 92.2 | 6.02 |
| B[ghi]p | ND   | 4.565 | 91.3 | 4.23 | 10.1 | 101  | 4.64 |

---

<sup>a</sup>ND, not detected or lower than LOD
